# Supplementary material for: Negative Thermal Quenching of Photoluminescence from Liquid-Crystalline Molecules in Condensed Phases
Source: MDPI journal article supplement (doi:10.3390/cryst11121555), 2021-12-13
Supplement: s1 [file s1]

Supplementary Information for:

## **Negative Thermal Quenching of Photoluminescence from Liquid-Crystalline Molecules in Condensed Phases**

Hussain Sami <sup>1,†</sup>, Osama Younis <sup>1,2,†</sup>, Yui Maruoka <sup>1</sup>, Kenta Yamaguchi <sup>1</sup>, Kumar Siddhant <sup>1</sup>,  
Kyohei Hisano <sup>1</sup>, and Osamu Tsutsumi <sup>1,\*</sup>

1 Department of Applied Chemistry, Ritsumeikan University, Kusatsu 525-8577, Japan.

2 Present address: Chemistry Department, Faculty of Science, New Valley University, El-Kharja 72511, Egypt.

\* Email: tsutsumi@sk.ritsumei.ac.jp

† These authors contributed equally to this manuscript.

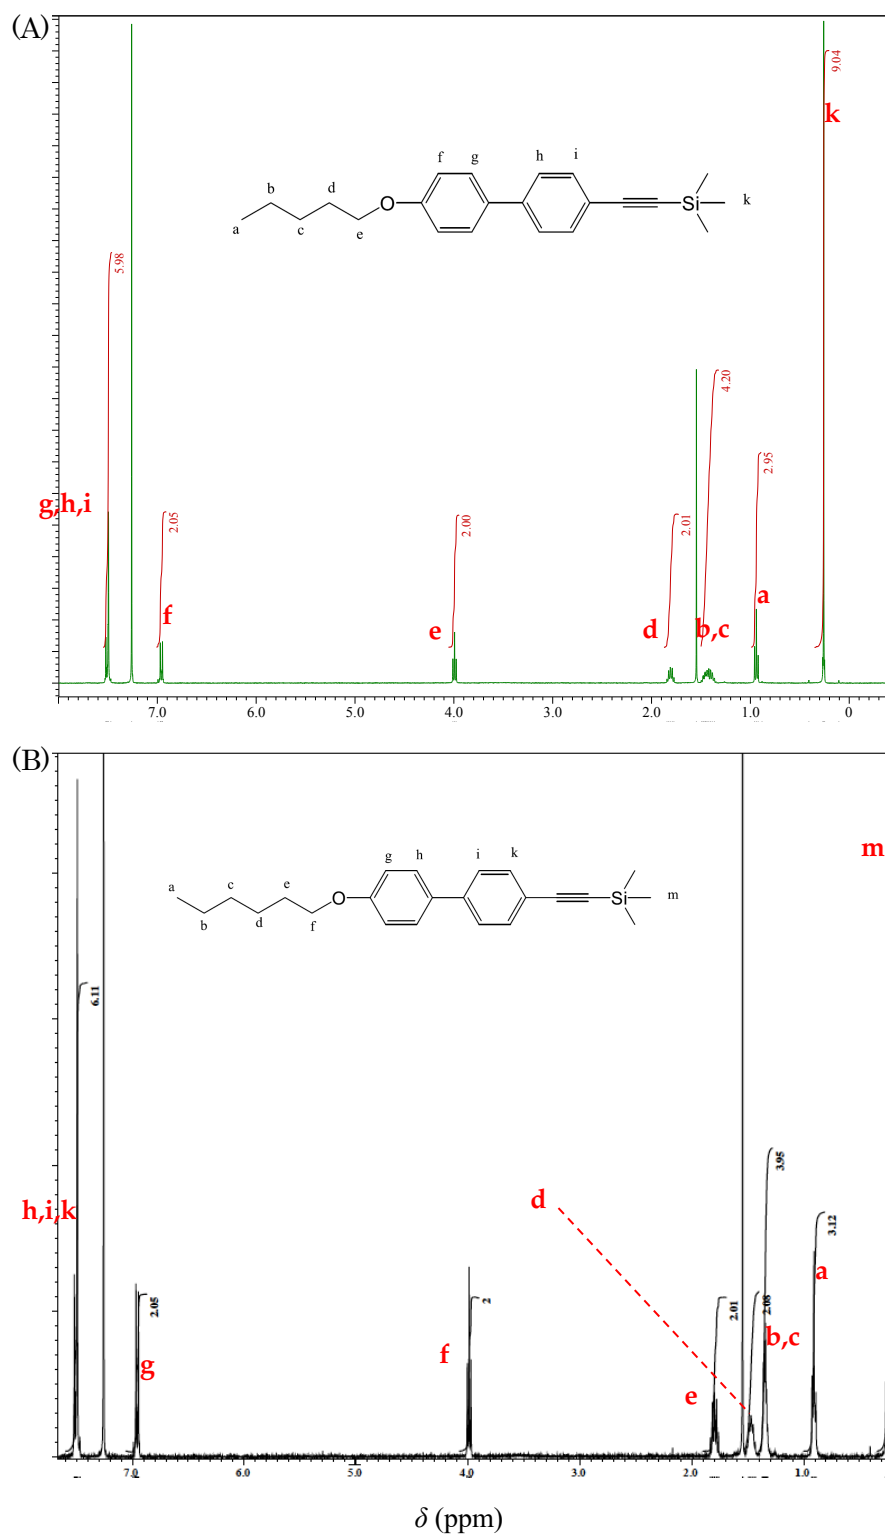

**Figure S1.** <sup>1</sup>H NMR spectra for compounds **5-BPTMS** (A) and **6-BPTMS** (B) in CDCl<sub>3</sub>.

(A)

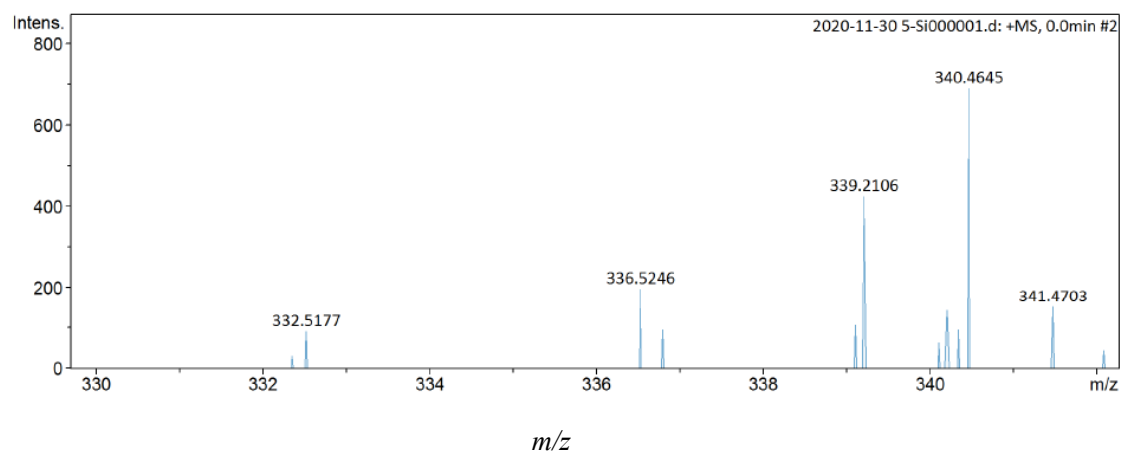

(B)

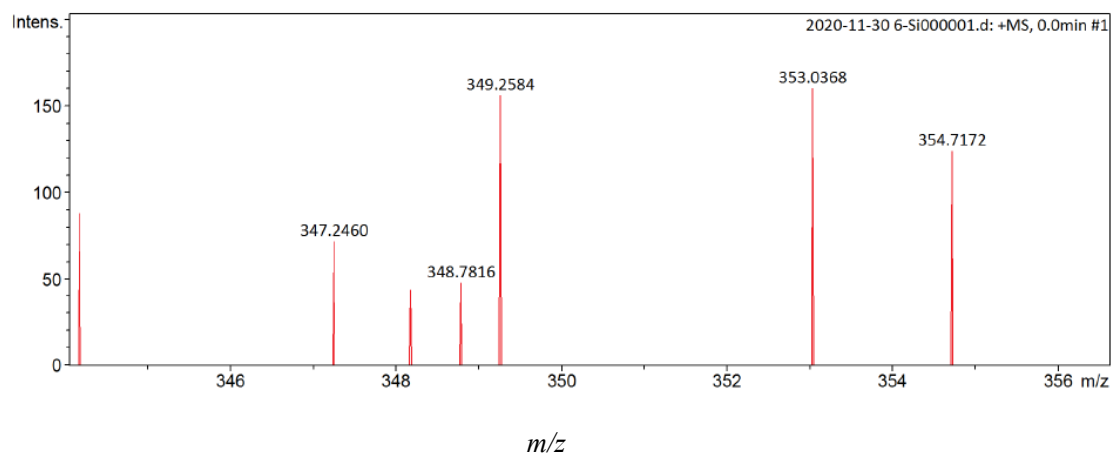

**Figure S2.** ESI-MS spectra for **5-BPTMS** (A) and **6-BPTMS** (B).

**Table S1.** Crystallographic data of compounds **5-BPTMS** and **6-BPTMS** obtained at room temperature.

| Compounds                                                                | <b>5-BPTMS</b>                      | <b>6-BPTMS</b>                      |
|--------------------------------------------------------------------------|-------------------------------------|-------------------------------------|
| Radiation type                                                           | Mo K $\alpha$                       | Mo K $\alpha$                       |
| Wavelength (Å)                                                           | 0.71073                             | 0.71073                             |
| Empirical formula                                                        | C <sub>22</sub> H <sub>28</sub> OSi | C <sub>23</sub> H <sub>30</sub> OSi |
| Formula weight                                                           | 336.53                              | 350.58                              |
| Temperature (K)                                                          | 293                                 | 293(2)                              |
| Crystal habit                                                            | needle                              | plate                               |
| Crystal color                                                            | colorless                           | colorless                           |
| Crystal system                                                           | triclinic                           | triclinic                           |
| Space group                                                              | <i>P</i> -1                         | <i>P</i> -1                         |
| <i>a</i> (Å)                                                             | 9.7958(4)                           | 10.6202(10)                         |
| <i>b</i> (Å)                                                             | 11.3838(5)                          | 15.6239(14)                         |
| <i>c</i> (Å)                                                             | 19.2863(8)                          | 21.913(2)                           |
| $\alpha$ (deg)                                                           | 90.456(2)                           | 70.612(3)                           |
| $\beta$ (deg)                                                            | 98.942(2)                           | 81.599(3)                           |
| $\gamma$ (deg)                                                           | 97.185(2)                           | 79.479(3)                           |
| <i>V</i> (Å <sup>3</sup> )                                               | 2107.04(15)                         | 3357.8(5)                           |
| <i>Z</i>                                                                 | 4                                   | 6                                   |
| $\rho$ (g cm <sup>-3</sup> )                                             | 1.061                               | 1.032                               |
| <i>R</i> [ <i>F</i> <sup>2</sup> > 2 $\sigma$ ( <i>F</i> <sup>2</sup> )] | 0.0750                              | 0.1157                              |
| <i>wR</i> ( <i>F</i> <sup>2</sup> )                                      | 0.2229                              | 0.3550                              |

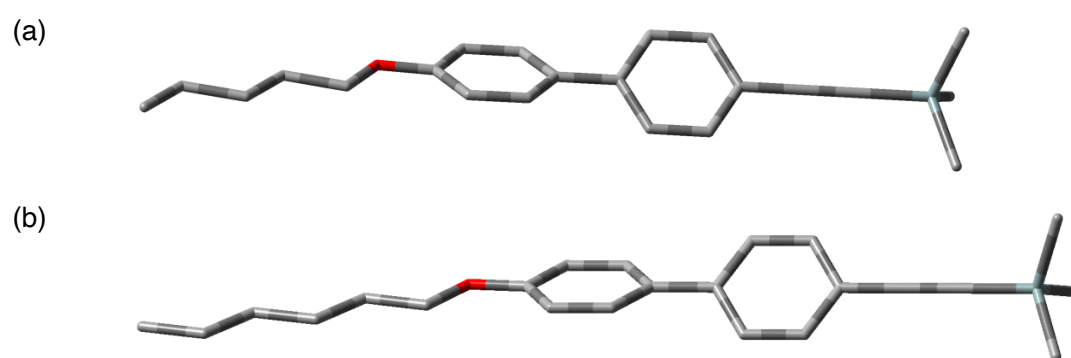**Figure S3.** Calculated molecular structure of **5-BPTMS** and **6-BPTMS** optimized by DFT calculation employing B3LYP hybrid functionals with 6-311+G(d,p) basis sets. Atom color legend: grey, C; white, H; red, O; grayish blue, Si.

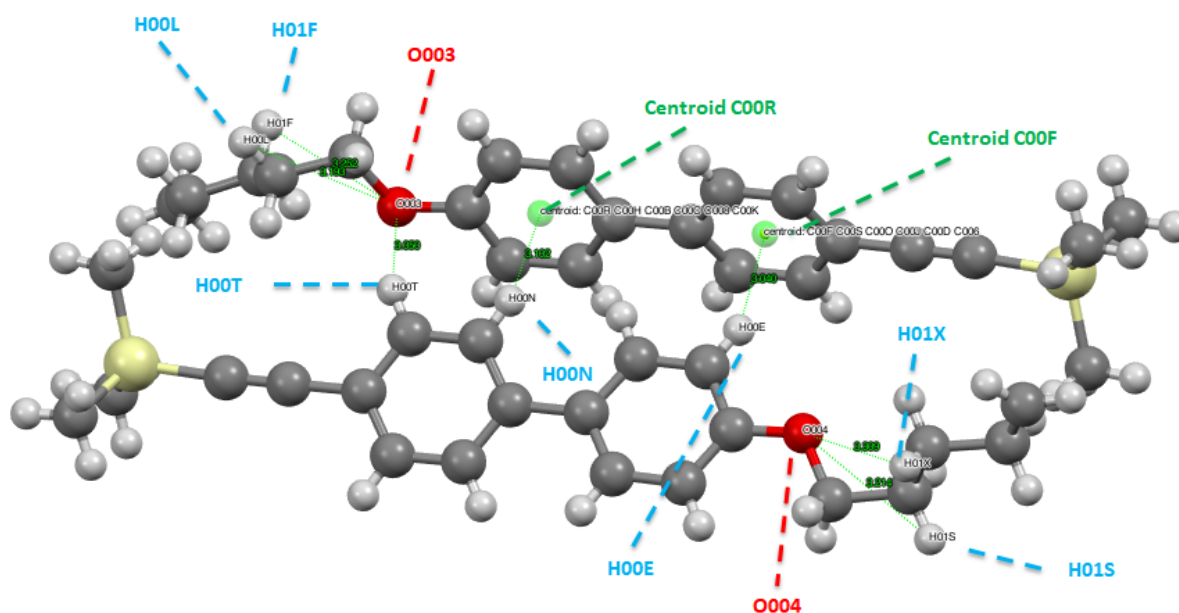

| Molecular Interaction between the atoms | Distances (Å) |
|-----------------------------------------|---------------|
| O004 – H01X                             | 3.309         |
| O004 – H01S                             | 3.214         |
| O003 – H00T                             | 3.050         |
| O003 – H00L                             | 3.193         |
| O003 – H01F                             | 3.252         |
| Centroid C00F – H00E                    | 3.040         |
| Centroid C00R – H00N                    | 3.102         |

**Figure S4.** Molecular structure of compound **5-BPTMS**. Atom color legend: gray, C; white, H; red, O; yellow, Si.

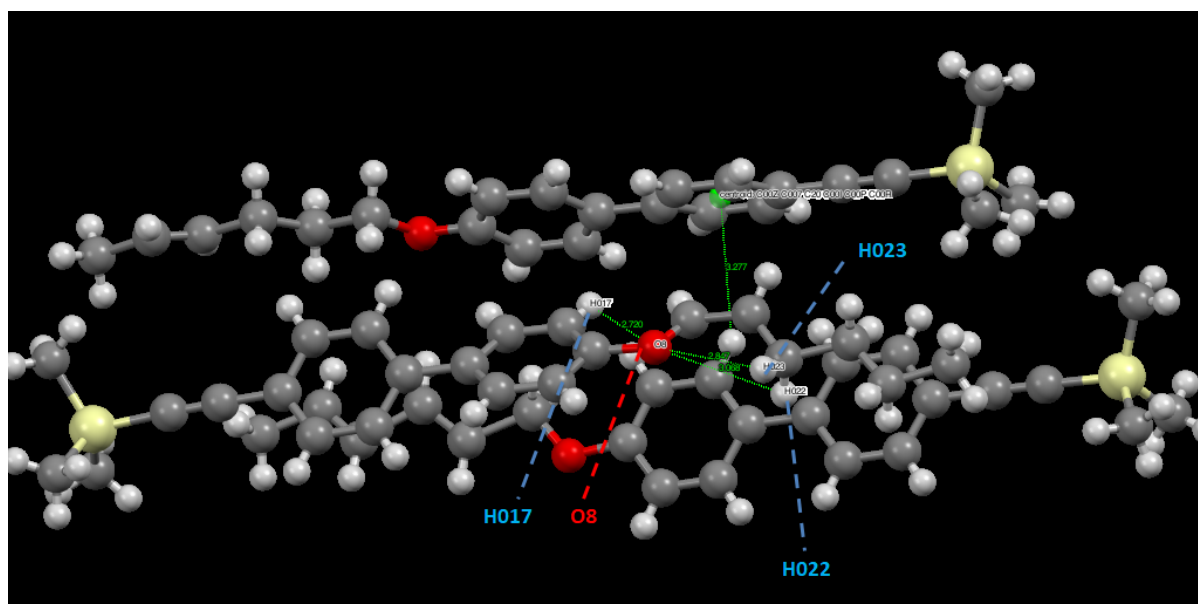

| Molecular Interaction between the atoms | Distances (Å) |
|-----------------------------------------|---------------|
| O8-H017                                 | 2.720         |
| O8-H023                                 | 2.847         |
| O8-H022                                 | 3.068         |

**Figure S5.** Molecular structure of compound **6-BPTMS**. Atom color legend: gray, C; white, H; red, O; yellow, Si.

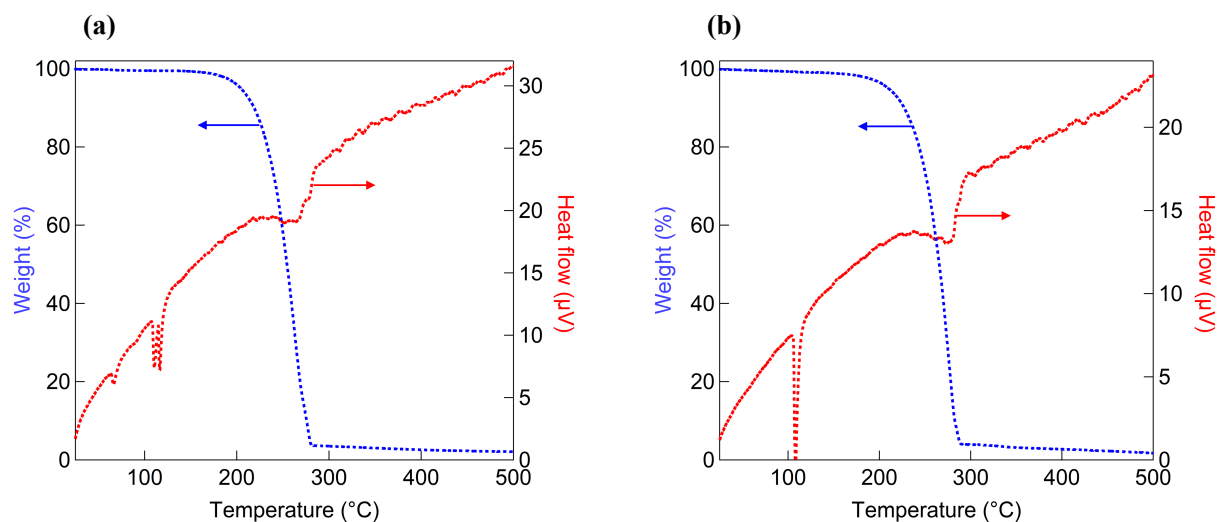

**Figure S6.** TG/DTA thermograms of **5-BPTMS** (a) and **6-BPTMS** (b) recorded under nitrogen atmosphere: heating rate of 5 °C min<sup>-1</sup>.

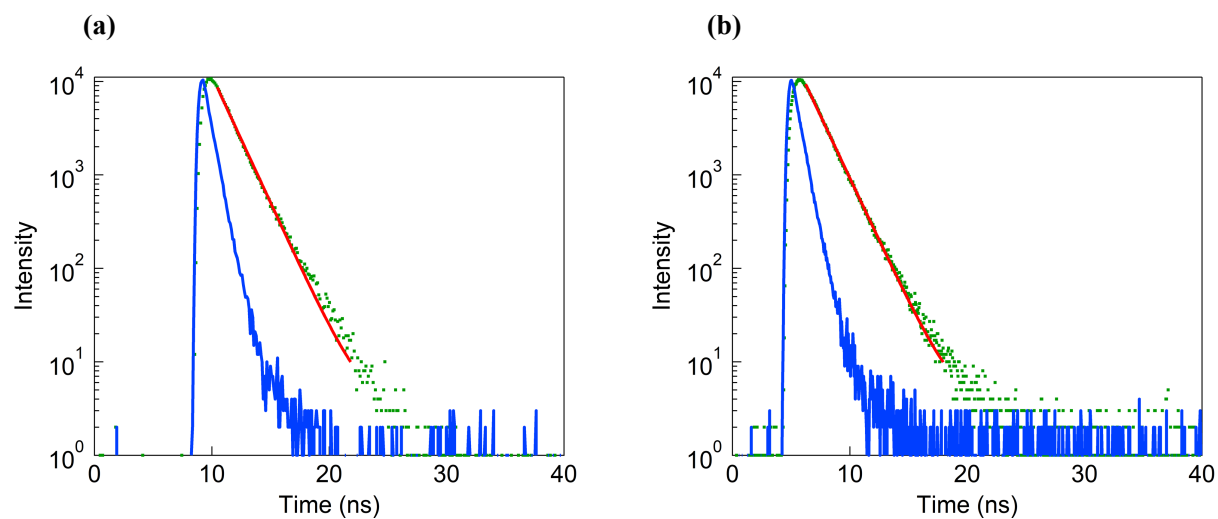

**Figure S7.** Luminescence decay profile of **5-BPTMS** (a) and **6-BPTMS** (b) at 380 nm (λ<sub>ex</sub> = 280 nm) in Cry at room temperature: green, observed luminescence decay; red, fitting curve; blue, instrument response function.

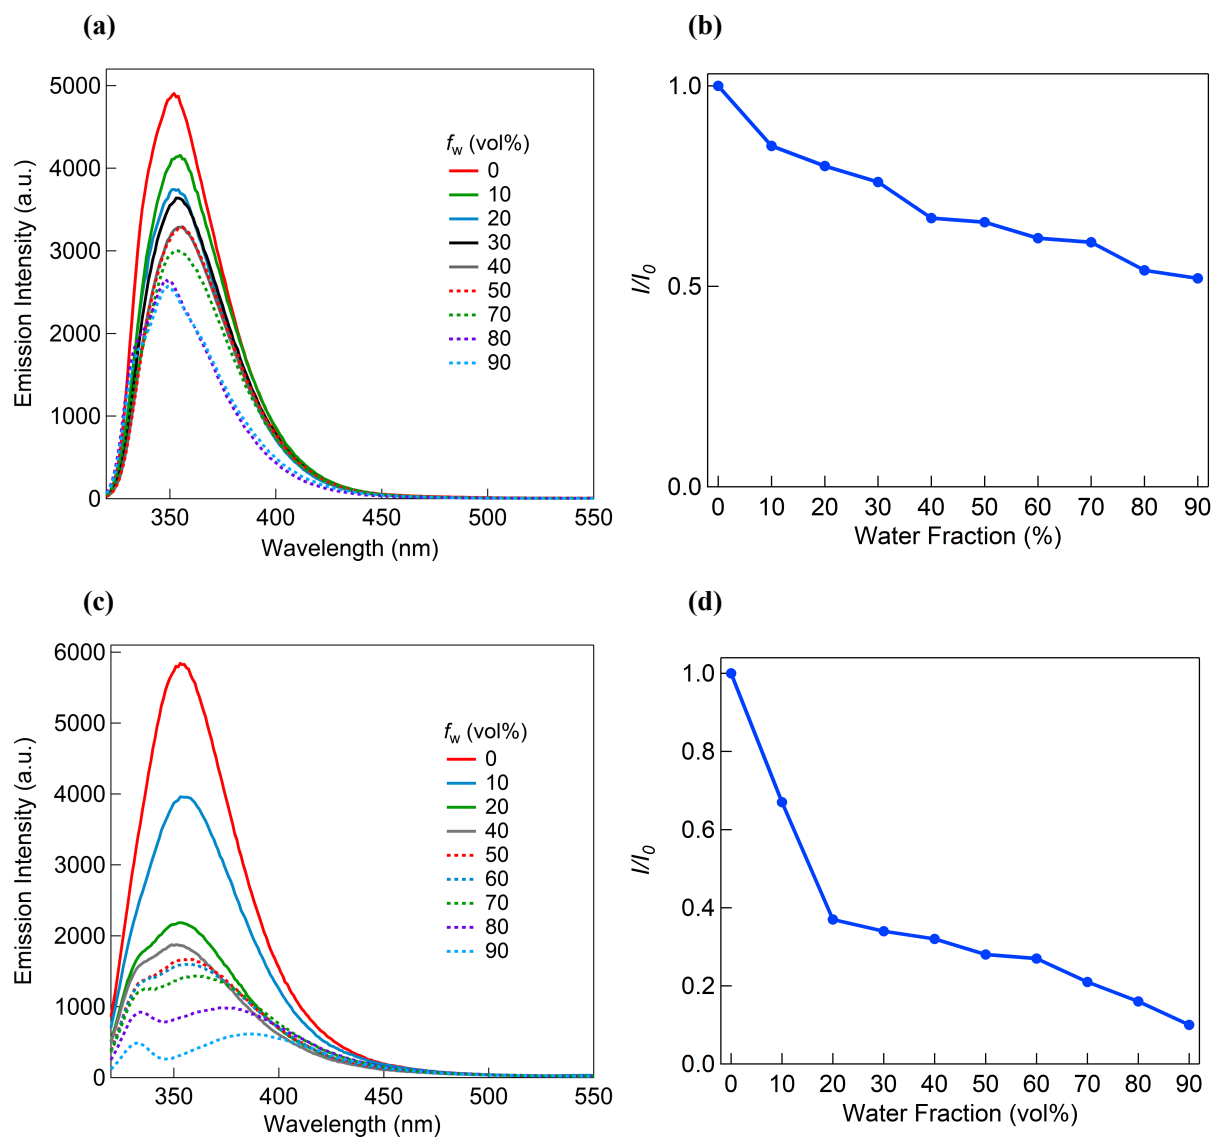

**Figure S8.** (a),(c) Luminescence spectra of compound **5-BPTMS** (a) and **6-BPTMS** (c) in THF/water mixtures with different water fractions ( $f_w$ ) ( $\lambda_{\text{ex}} = 296$  nm). (b),(d) Relative fluorescence intensity ( $I/I_0$ ) of the compound **5-BPTMS** (a) and **6-BPTMS** (c) at 350 nm in THF/water mixtures as a function of  $f_w$  ( $\lambda_{\text{ex}} = 296$  nm).  $I_0$  is defined as the fluorescence intensity of the compounds in pure THF.
